# Supplementary material
Source: publisher figshare collection journal article supplement (https://karger.figshare.com/articles/dataset/_/11567907)
Supplement: Supplementary file 1 [file 1]

**Supplementary table 1. Correlations between kidney function and the changes in serum electrolytes from first post-operative to pre-operative check**

| Spearman's rho            | baseline eGFR (ml/min/1.73m <sup>2</sup> ) | postoperative sCr (mg/dl) |
|---------------------------|--------------------------------------------|---------------------------|
| Δserum sodium (mmol/L)    | 0.052                                      | 0.068                     |
| Δserum potassium (mmol/L) | -0.098 <sup>#</sup>                        | 0.166 <sup>*</sup>        |

Correlations: <sup>\*</sup> $P < 0.01$ , <sup>#</sup> $P < 0.05$ . eGFR, estimated glomerular filtration rate; sCr, serum creatinine; Δserum sodium, the changes in serum sodium concentration from first post-operative to pre-operative check; Δserum potassium, the changes in serum potassium concentration from first post-operative to pre-operative check.
