# Supplementary material
Source: publisher figshare collection journal article supplement (https://karger.figshare.com/articles/dataset/_/11567907)
Supplement: Supplementary file 2 [file 1]

Archive with 3 entries (3 files):
- 504599_sm1.pdf
- 504599_sm2.pdf
- 504599_sm3.pdf
