# Supplementary material
Source: publisher figshare collection journal article supplement (https://karger.figshare.com/articles/dataset/_/11567907)
Supplement: Supplementary file 2 [file 1 › 504599_sm2.pdf]

**Supplementary table 2. Correlations between three biomarkers at ICU admission and kidney function**

| Spearman's rho | baseline eGFR (ml/min/1.73m <sup>2</sup> ) | postoperative sCr (mg/dl) | UP (ml/kg/h) |
|----------------|--------------------------------------------|---------------------------|--------------|
| sCysC (mg/L)   | -0.308*                                    | 0.470*                    | -0.100*      |
| uNAG (U/g Cre) | -0.118*                                    | -0.141*                   | 0.151*       |
| uACR(mg/g Cre) | -0.091 <sup>#</sup>                        | -0.031                    | 0.137*       |

Correlations: \* $P < 0.01$ , <sup>#</sup> $P < 0.05$ . ICU, intensive care unit; sCysC, serum Cystatin C; uNAG, urinary N-acetyl- $\beta$ -D-glucosaminidase; Cre, creatinine concentration; uACR, urinary albumin/creatinine ratio; eGFR, estimated glomerular filtration rate; sCr, serum creatinine; UP, urine production within the first 24 hours after operation.
