# Supplementary material
Source: publisher figshare collection journal article supplement (https://karger.figshare.com/articles/dataset/_/11567907)
Supplement: Supplementary file 2 [file 1 › 504599_sm3.pdf]

**Supplementary table 3. Predictive ability of the biomarkers (sCysC and uNAG) and their combination for postoperative AKI**

| Logistic regression model | AUC-ROC <sup>a</sup> (AKI-24hour <sup>b</sup> ) | AUC-ROC <sup>a</sup> (AKI-48hour <sup>c</sup> ) | AUC-ROC <sup>a</sup> (AKI-72hour <sup>d</sup> ) |
|---------------------------|-------------------------------------------------|-------------------------------------------------|-------------------------------------------------|
| <b>Univariate models</b>  |                                                 |                                                 |                                                 |
| sCysC                     | 0.787(0.716-0.857)                              | 0.752(0.698-0.836)                              | 0.749 (0.696-0.801)                             |
| uNAG                      | 0.725(0.642-0.808)                              | 0.722(0.664-0.780)                              | 0.718 (0.658-0.777)                             |
| <b>Multivariate model</b> |                                                 |                                                 |                                                 |
| uNAG + sCysC              | 0.828(0.765-0.890)                              | 0.787(0.737-0.836)                              | 0.785 (0.737-0.833)                             |

<sup>a</sup>Values are presented as AUC-ROC (95% confidence interval); <sup>b</sup>AKI-24hour, the postoperative AKI occurred within the first 24 hour after operation;

<sup>c</sup>AKI-48hour, the postoperative AKI occurred within the first 48 hour after operation; <sup>d</sup>AKI-72hour, the postoperative AKI occurred within the first 72 hour after operation.

Abbreviation: AUC-ROC, area under the receiver operating characteristic curve; AKI, acute kidney injury; sCysC, serum Cystatin C; uNAG , urinary

N-acetyl-β-D-glucosaminidase; Cre, creatinine concentration.
